# Supplementary material for: Role of Cannabidiol for Improvement of the Quality of Life in Cancer Patients: Potential and Challenges
Source: MDPI journal article supplement (doi:10.3390/ijms232112956), 2022-10-26
Supplement: s1 [file s1]

**Table S1. Common gene expression changes (logFC) in CBD treated glioma, neuroblastoma, and hepatocellular carcinoma cells.**

| Gene Symbol | Series GSE57978 | Series GSE151512 | Series GSE179661 |       |
|-------------|-----------------|------------------|------------------|-------|
|             | Primary glioma  | SK-N-BE(2)       | MHCC97H          | HepG2 |
| MT1H        | 0.49            | inf              | 13.78            | 12.84 |
| MT1G        | 0.95            | 6.63             | 16.76            | 7.18  |
| GDF15       | 2.25            | 5.30             | 3.06             | 4.77  |
| HMOX1       | 1.53            | 2.84             | 1.25             | 5.49  |
| AKNA        | 0.67            | 1.44             | 2.39             | 3.50  |
| DDIT3       | 1.96            | 1.35             | 4.52             | 4.47  |
| SESN2       | 1.32            | 1.16             | 2.64             | 4.31  |
| TRIB3       | 1.84            | 1.03             | 1.94             | 4.42  |
| GRB10       | 0.59            | 1.00             | 1.43             | 3.63  |
| PLK3        | 0.58            | 0.85             | 0.90             | 4.39  |
| ASNS        | 0.89            | 0.84             | 4.16             | 5.49  |
| SLC3A2      | 1.30            | 0.81             | 2.17             | 4.63  |
| UNC5B       | 1.43            | 0.69             | 3.73             | 4.99  |
| FBXO32      | 1.26            | 0.67             | 4.40             | 3.68  |
| SARS        | 0.76            | 0.65             | 1.52             | 1.68  |
| ATF3        | 1.42            | 0.59             | 6.45             | 7.45  |
| SQSTM1      | 0.92            | 0.56             | 1.44             | 4.08  |
| HERPUD1     | 0.97            | 0.56             | 3.85             | 3.32  |
| ADPRM       | 0.50            | 0.55             | 1.83             | 1.73  |
| RBM24       | 1.02            | 0.54             | 1.55             | 4.73  |
| UPP1        | 0.83            | 0.49             | 2.85             | 4.60  |
| CARS        | 0.74            | 0.46             | 1.31             | 1.37  |
| ANO10       | 0.81            | 0.45             | 1.51             | 1.00  |
| CEBPG       | 0.86            | 0.42             | 1.57             | 1.40  |
| GOT1        | 1.04            | 0.41             | 1.71             | 1.96  |
| BCL6        | 0.64            | 0.40             | 0.78             | 1.55  |
| ATF4        | 0.57            | 0.40             | 1.74             | 1.45  |
| HBEGF       | 0.97            | 0.38             | 2.43             | 5.48  |
| ZFP36       | 0.76            | 0.38             | 1.57             | 5.98  |
| PPP1R15A    | 1.80            | 0.38             | 3.73             | 6.90  |
| XBP1        | 0.99            | 0.31             | 1.32             | 1.42  |
| SLC30A1     | 0.59            | 0.31             | 2.59             | 3.56  |
| MARS        | 0.49            | 0.26             | 0.61             | 1.15  |
| GADD45A     | 1.23            | 0.23             | 3.14             | 4.35  |
| SNX25       | 0.71            | 0.22             | 0.25             | 0.63  |
| TARS        | 0.47            | 0.18             | 0.68             | 1.67  |

|          |       |       |       |       |
|----------|-------|-------|-------|-------|
| EIF4EBP1 | 0.82  | 0.17  | 1.23  | 1.25  |
| KDM7A    | 0.78  | 0.17  | 2.34  | 2.27  |
| ZNF107   | -0.68 | -0.22 | -1.42 | -2.65 |
| TMEM14A  | -0.43 | -0.33 | -1.45 | -1.19 |
| TCF19    | -0.94 | -0.34 | -0.72 | -1.39 |
| PIK3R1   | -0.66 | -0.47 | -1.60 | -2.95 |

**Table S2. Gene expression changes in breast cancer cells (EVSA-T) treated with THC (Series GSE8502)**

| Gene Symbol | log(FC) |
|-------------|---------|
| AA975768    | 2.20    |
| ASNS        | 1.00    |
| C1orf155    | 2.29    |
| C6orf111    | 2.20    |
| CALM3       | -2.29   |
| CCNA2       | -1.14   |
| CDC2        | -2.23   |
| CDKN1B      | 2.35    |
| CPEB4       | 2.35    |
| CYP51A1     | -2.32   |
| DHCR7       | -2.46   |
| DHFR        | -2.38   |
| DNAJA1      | -2.32   |
| EBP         | -2.29   |
| EIF1AP1     | -2.17   |
| EXOC2       | 1.20    |
| FNTA        | 1.38    |
| FTMT        | 2.32    |
| GIPC1       | -2.29   |
| HERPUD1     | 1.00    |
| HIST1H2AC   | 2.17    |
| HSPA2       | -2.17   |
| HSPA8       | -2.41   |
| HSPH1       | -1.07   |
| IMPA1       | 2.38    |
| IPO7        | 3.49    |
| KCMF1       | 1.43    |
| KIAA0101    | -2.43   |
| KIAA0146    | -2.58   |
| MCCC1       | 1.07    |
| MCM3        | -2.17   |

|          |       |
|----------|-------|
| MCM6     | -1.14 |
| MYC      | 2.35  |
| NP       | -2.46 |
| NUCB2    | 2.32  |
| PABPC4   | -2.29 |
| PPIF     | -2.23 |
| RAB5A    | 1.43  |
| RBM4     | -2.23 |
| RPS2     | 1.00  |
| RRM2     | -2.58 |
| SEC31L1  | 2.20  |
| SERINC1  | 1.07  |
| SERPINB2 | -2.49 |
| SESN1    | -2.51 |
| SFRS3    | -2.43 |
| SHMT2    | 1.00  |
| SLC3A2   | 1.68  |
| TFRC     | 2.14  |
| TGFB3    | 1.68  |
| TMEM109  | -2.32 |
| TncRNA   | 2.58  |
| TUBA2    | -2.17 |
| TUBA3    | -2.26 |
| TUBB     | -2.29 |
| UBADC1   | -2.17 |
| UHRF1    | -2.23 |
| USP3     | 1.49  |
| VEGF     | 1.20  |
| YY1AP1   | 2.20  |
| ZFP36L1  | 2.29  |
| ZNF265   | 2.20  |
| ZNF451   | 1.32  |
| ZUBR1    | 1.63  |
| ZWINT    | -1.43 |
